# Supplementary material for: Virtual Small Business Emergency Operations Center (VSBEOC): Shared Awareness and Decision Making for Small Business
Source: Oxford University Press journal article supplement (doi:10.1093/brain/awl266), 2011-06-01
Supplement: awl266_Supplementary_Data.zip [file awl266_Supplementary_Data.zip]

**Table S1 Neuropsychology**

|                                            | Y1 C410Y | Y2   | Y3   | M1 C410Y | M2  | Controls<br>( <i>M</i> ± <i>SD</i> ) | ( <i>P</i> 7 / <i>P</i> 93) |
|--------------------------------------------|----------|------|------|----------|-----|--------------------------------------|-----------------------------|
| <b>HAWIE-R</b>                             |          |      |      |          |     |                                      |                             |
| <i>Total IQ</i>                            | 133      | 131  | 102  | 111      | 101 | 122.5 ± 10.18                        | 104.76 / 136.53             |
| <i>Performance IQ</i>                      | 134      | 116  | 108  | 100      | 110 | 119.7 ± 11.78                        | 100.94 / 135.53             |
| <i>Verbal IQ</i>                           | 126      | 136  | 96   | 118      | 94  | 121.1 ± 10.35                        | 104.11 / 139.53             |
| <b>WMS-R</b>                               |          |      |      |          |     |                                      |                             |
| <i>Index verbal memory</i>                 | 122      | 102  | 88   | 79       | 95  | 113.1 ± 13.03                        | 88.76 / 130                 |
| <i>Index visual memory</i>                 | 91       | 107  | 98   | 94       | 105 | 117.9 ± 6.77                         | 104 / 126.53                |
| <i>Index general memory</i>                | 116      | 103  | 90   | 83       | 99  | 116.9 ± 11.66                        | 92.35 / 131.59              |
| <i>Index delayed memory</i>                | 96       | 112  | 90   | 68       | 105 | 117.95 ± 9.65                        | 97.29 / 133.06              |
| <i>Index concentration &amp; attention</i> | 99       | 87   | 94   | 90       | 94  | 102.75 ± 12.78                       | 84.88 / 130.12              |
| <b>Luria Mental Rotation</b>               |          |      |      |          |     |                                      |                             |
| <i># correct</i>                           | 10       | 10   | 10   | 10       | 9   | 9.5 ± 0.69                           | 8 / 10                      |
| <b>Kramer Card Sorting</b>                 |          |      |      |          |     |                                      |                             |
| <i># correct</i>                           | 6        | 6    | 3    | 4        | 5   | 4.85 ± 1.09                          | 3 / 6                       |
| <b>Stroop Color Interference</b>           |          |      |      |          |     |                                      |                             |
| <i>High interference run (sec)</i>         | 19       | 20.9 | 21.3 | 27.3     | 29  | 21.29 ± 5.39                         | 12.4 / 29.36                |
| <b>S-Words Fluency</b>                     |          |      |      |          |     |                                      |                             |
| <i># correct</i>                           | 32       | 41   | 9    | 40       | 25  | 34.45 ± 7.29                         | 23.88 / 49.59               |
| <b>5-Point Nonverbal Fluency</b>           |          |      |      |          |     |                                      |                             |
| <i># correct</i>                           | 38       | 44   | 36   | 30       | 28  | 40.15 ± 7.26                         | 26.76 / 52                  |
| <b>CERAD-NAB</b>                           |          |      |      |          |     |                                      |                             |
| <i>MMSE</i>                                |          |      |      | 28       | 29  |                                      |                             |
| <i>Verbal fluency</i>                      |          |      |      | 24       | 23  |                                      |                             |
| <i>Boston naming test</i>                  |          |      |      | 15       | 15  |                                      |                             |
| <i>Wordlist learning 1</i>                 |          |      |      | 5        | 5   |                                      |                             |
| <i>Wordlist learning 2</i>                 |          |      |      | 8        | 8   |                                      |                             |
| <i>Wordlist learning 3</i>                 |          |      |      | 8        | 10  |                                      |                             |
| <i>Wordlist recall</i>                     |          |      |      | 6        | 9   |                                      |                             |
| <i>Wordlist recognition (hits)</i>         |          |      |      | 9        | 10  |                                      |                             |
| <i>Wordlist recognition (corr. rej.)</i>   |          |      |      | 10       | 10  |                                      |                             |
| <i>Constructive praxia</i>                 |          |      |      | 11       | 10  |                                      |                             |
| <i>Constructive praxia recall</i>          |          |      |      | 8        | 8   |                                      |                             |

HAWIE-R, Hamburg Wechsler Intelligence Scale Revised; WMS-R, Wechsler Memory Scale Revised; MMSE, Mini Mental State Examination; CERAD-NAB, Consortium to Establish a Registry for Alzheimer's Disease – Neuropsychological Assessment Battery; sec, seconds; corr. rej., correct rejections.

**Table S2** Brain activation differences between Y1 C410Y and the control group during the memory tasks

| MNI coordinates (mm)       |            |     |     |     |    |     |                   | MNI coordinates (mm)       |            |     |     |    |    |     |      |
|----------------------------|------------|-----|-----|-----|----|-----|-------------------|----------------------------|------------|-----|-----|----|----|-----|------|
| Brain region               | Left/Right | x   | y   | z   | BA | kE  | t                 | Brain region               | Left/Right | x   | y   | z  | BA | kE  | t    |
| Two sample T-Test          |            |     |     |     |    |     |                   |                            |            |     |     |    |    |     |      |
| Y1 C410Y > Controls        |            |     |     |     |    |     |                   | Controls > Y1 C410Y        |            |     |     |    |    |     |      |
| Associative learning       |            |     |     |     |    |     |                   | Associative learning       |            |     |     |    |    |     |      |
| Hippocampus                | L          | -38 | -34 | -6  |    | 7   | 3.44 <sup>a</sup> | no significant differences |            |     |     |    |    |     |      |
| Fusiform gyrus             | L          | -22 | -78 | -18 | 19 | 147 | 7.31              |                            |            |     |     |    |    |     |      |
| Fusiform gyrus             | L          | -34 | -46 | -22 | 37 | 210 | 6.02              |                            |            |     |     |    |    |     |      |
| Superior frontal gyrus     | L          | -12 | 30  | 58  | 8  | 20  | 6.3               |                            |            |     |     |    |    |     |      |
| Middle frontal gyrus       | L          | -50 | 16  | 42  | 8  | 112 | 5.92              |                            |            |     |     |    |    |     |      |
| Middle frontal gyrus       | L          | -34 | 56  | 4   | 10 | 61  | 5.02              |                            |            |     |     |    |    |     |      |
| Middle frontal gyrus       | L          | -30 | 42  | 16  | 46 | 47  | 4.68              |                            |            |     |     |    |    |     |      |
| Middle temporal gyrus      | L          | -60 | -58 | 16  | 37 | 210 | 5.78              |                            |            |     |     |    |    |     |      |
| Supramarginal gyrus        | L          | -38 | -60 | 38  | 40 | 57  | 4.44              |                            |            |     |     |    |    |     |      |
| Precuneus                  | L          | -6  | -60 | 44  | 7  | 265 | 5.98              |                            |            |     |     |    |    |     |      |
| Single face learning       |            |     |     |     |    |     |                   | Single face learning       |            |     |     |    |    |     |      |
| Middle frontal gyrus       | L          | -44 | 50  | 4   | 10 | 113 | 6.24              | no significant differences |            |     |     |    |    |     |      |
| Middle frontal gyrus       | L          | -50 | 16  | 42  | 8  | 103 | 5.92              |                            |            |     |     |    |    |     |      |
| Fusiform gyrus             | L          | -18 | -80 | -18 | 19 | 204 | 5.95              |                            |            |     |     |    |    |     |      |
| Associative retrieval      |            |     |     |     |    |     |                   | Associative retrieval      |            |     |     |    |    |     |      |
| Middle frontal gyrus       | L          | -38 | 56  | 8   | 10 | 49  | 6.08              | no significant differences |            |     |     |    |    |     |      |
| Middle frontal gyrus       | R          | 40  | 52  | -10 | 10 | 47  | 5.23              |                            |            |     |     |    |    |     |      |
| Inferior frontal gyrus     | L          | -50 | 16  | 42  | 9  | 23  | 3.95              |                            |            |     |     |    |    |     |      |
| Inferior frontal gyrus     | L          | -38 | 24  | -2  | 47 | 19  | 4.22              |                            |            |     |     |    |    |     |      |
| Fusiform gyrus             | L          | -22 | -78 | -20 | 19 | 35  | 4.41              |                            |            |     |     |    |    |     |      |
| Supramarginal gyrus        | R          | 40  | -64 | 40  | 40 | 61  | 6.08              |                            |            |     |     |    |    |     |      |
| Supramarginal gyrus        | R          | 50  | -64 | 32  | 40 | 18  | 3.91              |                            |            |     |     |    |    |     |      |
| Inferior parietal lobule   | L          | -38 | -46 | 44  | 40 | 36  | 4.34              |                            |            |     |     |    |    |     |      |
| Inferior parietal lobule   | L          | -38 | -60 | 40  | 40 | 41  | 4.24              |                            |            |     |     |    |    |     |      |
| Face recognition           |            |     |     |     |    |     |                   | Face recognition           |            |     |     |    |    |     |      |
| no significant differences |            |     |     |     |    |     |                   | no significant differences |            |     |     |    |    |     |      |
| Novel face detection       |            |     |     |     |    |     |                   | Novel face detection       |            |     |     |    |    |     |      |
| Middle frontal gyrus       | L          | -38 | 56  | 6   | 10 | 25  | 4.72              | no significant differences |            |     |     |    |    |     |      |
| Supramarginal gyrus        | R          | 40  | -66 | 40  | 40 | 44  | 6.19              |                            |            |     |     |    |    |     |      |
| Supramarginal gyrus        | L          | -40 | -62 | 38  | 40 | 46  | 4.23              |                            |            |     |     |    |    |     |      |
| Superior parietal lobule   | R          | 14  | -58 | 50  | 7  | 33  | 4.64              |                            |            |     |     |    |    |     |      |
| Precuneus                  | L          | -10 | -56 | 46  | 7  | 28  | 4.46              |                            |            |     |     |    |    |     |      |
| Working memory             |            |     |     |     |    |     |                   | Working memory             |            |     |     |    |    |     |      |
| Inferior frontal gyrus     | L          | -48 | 26  | 4   | 45 | 78  | 4.98              | Superior frontal gyrus     | R          | 4   | 56  | 24 | 9  | 355 | 6.9  |
| Middle frontal gyrus       | L          | -44 | 20  | 40  | 8  | 182 | 9.76              | Cingulate gyrus            | R          | 4   | -46 | 32 | 31 | 27  | 5.04 |
| Middle frontal gyrus       | L          | -42 | 36  | 32  | 9  | 23  | 4.52              | Superior temporal gyrus    | R          | 48  | -8  | -4 | 22 | 61  | 5.39 |
| Middle frontal gyrus       | R          | 42  | 34  | 40  | 8  | 75  | 6.37              | Superior temporal gyrus    | L          | -50 | -62 | 24 | 39 | 96  | 5.19 |
| Superior frontal gyrus     | R          | 28  | -4  | 50  | 6  | 43  | 5.21              |                            |            |     |     |    |    |     |      |
| Inferior parietal lobule   | L          | -50 | -32 | 32  | 40 | 157 | 8.4               |                            |            |     |     |    |    |     |      |
| Superior parietal lobule   | L          | -12 | -52 | 70  | 7  | 533 | 5.54              |                            |            |     |     |    |    |     |      |
| Superior parietal lobule   | L          | -24 | -74 | 54  | 7  | 24  | 5.05              |                            |            |     |     |    |    |     |      |
| Superior parietal lobule   | R          | 8   | -52 | 70  | 7  | 206 | 6.74              |                            |            |     |     |    |    |     |      |
| Superior parietal lobule   | R          | 34  | -80 | 40  | 7  | 17  | 4.42              |                            |            |     |     |    |    |     |      |
| Cingulate gyrus            | L          | -8  | 18  | 32  | 24 | 19  | 6.12              |                            |            |     |     |    |    |     |      |
| Superior temporal gyrus    | L          | -54 | -44 | 14  | 22 | 59  | 4.64              |                            |            |     |     |    |    |     |      |
| Cerebellum                 | L          | -2  | -50 | -30 |    | 223 | 8.23              |                            |            |     |     |    |    |     |      |
| Cerebellum                 | R          | 10  | -78 | -28 |    | 18  | 4.06              |                            |            |     |     |    |    |     |      |

t, value of peak within significantly activated cluster of voxels; kE, cluster size (in voxels); BA, Brodmann area; a,  $p < 0.005$ ; L, left; R, right.

**Table S3** Brain activation differences between Y2 and the control group during the memory tasks

| MNI coordinates (mm)       |            |     |     |     |    |    |      | MNI coordinates (mm)       |            |    |     |     |    |    |      |
|----------------------------|------------|-----|-----|-----|----|----|------|----------------------------|------------|----|-----|-----|----|----|------|
| Brain region               | Left/Right | x   | y   | z   | BA | kE | t    | Brain region               | Left/Right | x  | y   | z   | BA | kE | t    |
| Two sample T-Test          |            |     |     |     |    |    |      |                            |            |    |     |     |    |    |      |
| Y2 > Controls              |            |     |     |     |    |    |      | Controls > Y2              |            |    |     |     |    |    |      |
| Associative learning       |            |     |     |     |    |    |      | Associative learning       |            |    |     |     |    |    |      |
| Superior temporal gyrus    | R          | 52  | 16  | -12 | 38 | 20 | 3.8  | no significant differences |            |    |     |     |    |    |      |
| Insula                     | R          | 40  | -14 | 2   |    | 16 | 4.12 |                            |            |    |     |     |    |    |      |
| Single face learning       |            |     |     |     |    |    |      | Single face learning       |            |    |     |     |    |    |      |
| Middle frontal gyrus       | L          | -44 | 44  | 6   | 46 | 33 | 4.73 | no significant differences |            |    |     |     |    |    |      |
| Associative retrieval      |            |     |     |     |    |    |      | Associative retrieval      |            |    |     |     |    |    |      |
| Inferior frontal gyrus     | R          | 44  | 34  | -6  | 47 | 44 | 5.6  | Superior frontal gyrus     | L          | -2 | 64  | 16  | 9  | 33 | 4.62 |
|                            |            |     |     |     |    |    |      | Cingulate gyrus            | L          | -8 | -58 | 26  | 31 | 37 | 4.6  |
|                            |            |     |     |     |    |    |      | Cingulate gyrus            | L          | -6 | 46  | 6   | 32 | 43 | 4.49 |
| Face recognition           |            |     |     |     |    |    |      | Face recognition           |            |    |     |     |    |    |      |
| no significant differences |            |     |     |     |    |    |      | no significant differences |            |    |     |     |    |    |      |
| Novel face detection       |            |     |     |     |    |    |      | Novel face detection       |            |    |     |     |    |    |      |
| Inferior frontal gyrus     | R          | 44  | 36  | -6  | 47 | 18 | 4.93 | Middle temporal gyrus      | R          | 46 | 6   | -28 | 21 | 43 | 3.88 |
| Working memory             |            |     |     |     |    |    |      | Working memory             |            |    |     |     |    |    |      |
| Inferior frontal gyrus     | R          | 32  | 18  | -16 | 47 | 36 | 6.04 | no significant differences |            |    |     |     |    |    |      |
| Superior frontal gyrus     | R          | 30  | -10 | 64  | 6  | 29 | 5.03 |                            |            |    |     |     |    |    |      |
| Insula                     | L          | -32 | 10  | 12  |    | 16 | 5.18 |                            |            |    |     |     |    |    |      |
| Cerebellum                 | L          | -4  | -84 | -32 |    | 15 | 4.71 |                            |            |    |     |     |    |    |      |
| Cerebellum                 | R          | 26  | -32 | -32 |    | 28 | 4.22 |                            |            |    |     |     |    |    |      |

t, value of peak within significantly activated cluster of voxels; kE, cluster size (in voxels); BA, Brodmann area; a, p < 0.005; L, left; R, right.

**Table S4** Brain activation differences between Y3 and the control group during the memory tasks

| MNI coordinates (mm)         |            |     |     |     |    |     |      | MNI coordinates (mm)         |            |     |     |     |       |     |                   |
|------------------------------|------------|-----|-----|-----|----|-----|------|------------------------------|------------|-----|-----|-----|-------|-----|-------------------|
| Brain region                 | Left/Right | x   | y   | z   | BA | kE  | t    | Brain region                 | Left/Right | x   | y   | z   | BA    | kE  | t                 |
| <b>Two sample T-Test</b>     |            |     |     |     |    |     |      |                              |            |     |     |     |       |     |                   |
| <b>Y3 &gt; Controls</b>      |            |     |     |     |    |     |      | <b>Controls &gt; Y3</b>      |            |     |     |     |       |     |                   |
| <b>Associative learning</b>  |            |     |     |     |    |     |      | <b>Associative learning</b>  |            |     |     |     |       |     |                   |
| Fusiform gyrus               | R          | 40  | -50 | -20 | 37 | 19  | 4.69 | Superior temporal gyrus      | L          | -58 | -24 | 10  | 22    | 18  | 4.13              |
| Fusiform gyrus               | L          | -46 | -48 | -30 | 37 | 19  | 4.66 |                              |            |     |     |     |       |     |                   |
| <b>Single face learning</b>  |            |     |     |     |    |     |      | <b>Single face learning</b>  |            |     |     |     |       |     |                   |
| Superior frontal gyrus       | L          | -14 | 62  | 24  | 9  | 115 | 5.96 | Superior temporal gyrus      | L          | -60 | -24 | 10  | 22/42 | 114 | 6.41              |
| Fusiform gyrus               | R          | 42  | -52 | -22 | 37 | 41  | 4.95 |                              |            |     |     |     |       |     |                   |
| <b>Associative retrieval</b> |            |     |     |     |    |     |      | <b>Associative retrieval</b> |            |     |     |     |       |     |                   |
| Fusiform gyrus               | R          | 40  | -52 | -24 | 37 | 76  | 7.11 | Parahippocampal gyrus        | L          | -12 | -36 | -2  |       | 15  | 4.21              |
| Fusiform gyrus               | R          | 34  | -70 | -20 | 19 | 36  | 4.28 | Rhinal cortex                | L          | -22 | -6  | -32 |       | 15  | 5.02              |
| Fusiform gyrus               | L          | -44 | -48 | -26 | 37 | 17  | 4.72 | Medial frontal gyrus         | R          | 2   | 58  | -10 | 10    | 15  | 5.02              |
|                              |            |     |     |     |    |     |      | Retrosplenial cortex         | L/R        | -8  | -48 | 10  | 29    | 147 | 5.11              |
| <b>Face recognition</b>      |            |     |     |     |    |     |      | <b>Face recognition</b>      |            |     |     |     |       |     |                   |
| Fusiform gyrus               | R          | 40  | -50 | -24 | 37 | 208 | 8.09 | Medial frontal gyrus         | R          | 2   | 58  | -10 | 10    | 74  | 4.72              |
| Fusiform gyrus               | L          | -44 | -48 | -26 | 37 | 49  | 5.18 |                              |            |     |     |     |       |     |                   |
| Inferior occipital gyrus     | L          | -40 | -84 | -12 | 19 | 53  | 5.69 |                              |            |     |     |     |       |     |                   |
| <b>Novel face detection</b>  |            |     |     |     |    |     |      | <b>Novel face detection</b>  |            |     |     |     |       |     |                   |
| Fusiform gyrus               | R          | 42  | -50 | -22 | 37 | 271 | 8.62 | Entorhinal cortex            | L          | -22 | -16 | -30 |       | 8   | 3.31 <sup>a</sup> |
| Fusiform gyrus               | L          | -44 | -48 | -26 | 37 | 97  | 5.82 | Medial frontal gyrus         | R          | 2   | 58  | -12 | 10    | 17  | 4.23              |
| <b>Working memory</b>        |            |     |     |     |    |     |      | <b>Working memory</b>        |            |     |     |     |       |     |                   |
| Middle frontal gyrus         | R          | 44  | 52  | 6   | 10 | 367 | 7.83 | no significant differences   |            |     |     |     |       |     |                   |
| Middle frontal gyrus         | R          | 34  | 10  | 44  | 6  | 96  | 5.6  |                              |            |     |     |     |       |     |                   |
| Superior parietal lobule     | R          | 26  | -54 | 52  | 7  | 232 | 7.76 |                              |            |     |     |     |       |     |                   |
| Superior parietal lobule     | L          | -40 | -56 | 54  | 7  | 228 | 6.18 |                              |            |     |     |     |       |     |                   |
| Inferior temporal gyrus      | L          | -56 | -64 | -16 | 37 | 179 | 5.78 |                              |            |     |     |     |       |     |                   |
| Inferior temporal gyrus      | R          | 54  | -60 | -16 | 37 | 187 | 5.31 |                              |            |     |     |     |       |     |                   |
| Cerebellum                   | L          | -14 | -84 | -26 |    | 380 | 7.74 |                              |            |     |     |     |       |     |                   |
| Cerebellum                   | R          | 10  | -86 | -30 |    | 112 | 5.4  |                              |            |     |     |     |       |     |                   |

t, value of peak within significantly activated cluster of voxels; kE, cluster size (in voxels); BA, Brodmann area; a,  $p < 0.005$ ; L, left; R, right.

**Table S5** Brain activation differences between M1 C410Y and the control group during the memory tasks

| MNI coordinates (mm)       |            |    |     |     |    |    |      | MNI coordinates (mm)       |            |     |     |     |    |     |      |
|----------------------------|------------|----|-----|-----|----|----|------|----------------------------|------------|-----|-----|-----|----|-----|------|
| Brain region               | Left/Right | x  | y   | z   | BA | kE | t    | Brain region               | Left/Right | x   | y   | z   | BA | kE  | t    |
| Two sample T-Test          |            |    |     |     |    |    |      |                            |            |     |     |     |    |     |      |
| M1 C410Y > Controls        |            |    |     |     |    |    |      | Controls > M1 C410Y        |            |     |     |     |    |     |      |
| Associative learning       |            |    |     |     |    |    |      | Associative learning       |            |     |     |     |    |     |      |
| no significant differences |            |    |     |     |    |    |      | Hippocampus                | R          | 26  | -10 | -22 |    | 17  | 4.56 |
|                            |            |    |     |     |    |    |      | Hippocampus                | R          | 26  | -30 | -6  |    | 5   | 3.98 |
|                            |            |    |     |     |    |    |      | Amygdala                   | L          | -32 | -8  | -26 |    | 11  | 4.74 |
|                            |            |    |     |     |    |    |      | Middle frontal gyrus       | L          | -24 | 60  | -2  | 10 | 72  | 7.45 |
|                            |            |    |     |     |    |    |      | Middle frontal gyrus       | R          | 24  | 60  | 8   | 10 | 31  | 4.92 |
|                            |            |    |     |     |    |    |      | Superior temporal gyrus    | L          | -56 | -2  | -4  | 22 | 101 | 6.16 |
|                            |            |    |     |     |    |    |      | Superior temporal gyrus    | L          | -50 | -20 | 4   | 22 | 92  | 6.1  |
|                            |            |    |     |     |    |    |      | Superior temporal gyrus    | R          | 52  | -8  | -4  | 22 | 38  | 4.29 |
|                            |            |    |     |     |    |    |      | Cingulate gyrus            | R          | 2   | 38  | 6   | 24 | 35  | 3.58 |
|                            |            |    |     |     |    |    |      | Fusiform gyrus             | L          | -32 | -36 | -30 | 36 | 26  | 4.65 |
| Single face learning       |            |    |     |     |    |    |      | Single face learning       |            |     |     |     |    |     |      |
| Middle frontal gyrus       | R          | 26 | 52  | -10 | 11 | 24 | 5.77 | Inferior frontal gyrus     | R          | 44  | 38  | -10 | 47 | 41  | 4.78 |
|                            |            |    |     |     |    |    |      | Middle frontal gyrus       | L          | -20 | 60  | -2  | 10 | 123 | 8.11 |
|                            |            |    |     |     |    |    |      | Middle frontal gyrus       | R          | 18  | 62  | 2   | 10 | 127 | 5.04 |
|                            |            |    |     |     |    |    |      | Medial frontal gyrus       | L          | -10 | 48  | -6  | 10 | 29  | 5.17 |
|                            |            |    |     |     |    |    |      | Orbital gyrus              | L          | -28 | 46  | -14 | 11 | 190 | 9.29 |
|                            |            |    |     |     |    |    |      | Superior temporal gyrus    | L          | -36 | 8   | -28 | 38 | 257 | 7.74 |
|                            |            |    |     |     |    |    |      | Superior temporal gyrus    | L          | -56 | 0   | -4  | 22 | 113 | 5.73 |
|                            |            |    |     |     |    |    |      | Superior temporal gyrus    | L          | -58 | -10 | 4   | 22 | 196 | 5.57 |
| Associative retrieval      |            |    |     |     |    |    |      | Associative retrieval      |            |     |     |     |    |     |      |
| Orbital gyrus              | R          | 18 | 54  | -10 | 11 | 22 | 6.07 | Hippocampus                | L          | -22 | -30 | -10 |    | 10  | 4.07 |
|                            |            |    |     |     |    |    |      | Hippocampus                | R          | 24  | -10 | -20 |    | 2   | 3.68 |
|                            |            |    |     |     |    |    |      | Parahippocampal gyrus      | R          | 30  | -32 | -14 |    | 6   | 3.81 |
|                            |            |    |     |     |    |    |      | Perirhinal cortex          | L          | -16 | -4  | -32 |    | 19  | 5.43 |
|                            |            |    |     |     |    |    |      | Superior temporal gyrus    | L          | -52 | -2  | -6  | 22 | 51  | 5.38 |
|                            |            |    |     |     |    |    |      | Superior temporal gyrus    | R          | 62  | -8  | 4   | 22 | 18  | 4.36 |
| Face recognition           |            |    |     |     |    |    |      | Face recognition           |            |     |     |     |    |     |      |
| no significant differences |            |    |     |     |    |    |      | Hippocampus                | R          | 20  | -30 | -12 |    | 28  | 4.86 |
|                            |            |    |     |     |    |    |      | Middle frontal gyrus       | L          | -22 | 60  | -2  | 10 | 16  | 5.62 |
| Novel face detection       |            |    |     |     |    |    |      | Novel face detection       |            |     |     |     |    |     |      |
| no significant differences |            |    |     |     |    |    |      | Superior temporal gyrus    | L          | -54 | 0   | -6  | 22 | 197 | 6.08 |
|                            |            |    |     |     |    |    |      | Superior temporal gyrus    | L          | -58 | -10 | 8   | 22 | 43  | 4.82 |
|                            |            |    |     |     |    |    |      | Medial frontal gyrus       | R          | 8   | -14 | 64  | 6  | 48  | 5.13 |
|                            |            |    |     |     |    |    |      | Cerebellum                 | L          | -32 | -46 | -32 |    | 46  | 4.28 |
| Working memory             |            |    |     |     |    |    |      | Working memory             |            |     |     |     |    |     |      |
| Inferior frontal gyrus     | R          | 24 | 48  | -12 | 11 | 65 | 6.43 | no significant differences |            |     |     |     |    |     |      |
| Inferior parietal lobule   | R          | 54 | -44 | 36  | 40 | 83 | 5.82 |                            |            |     |     |     |    |     |      |
| Superior parietal lobule   | R          | 32 | -78 | 42  | 7  | 69 | 6.03 |                            |            |     |     |     |    |     |      |

t, value of peak within significantly activated cluster of voxels; kE, cluster size (in voxels); BA, Brodmann area; a,  $p < 0.005$ ; L, left; R, right.

**Table S6** Brain activation differences between M2 and the control group during the memory tasks

| MNI coordinates (mm)         |            |     |     |     |    |     |      | MNI coordinates (mm)         |            |     |     |     |    |     |                   |
|------------------------------|------------|-----|-----|-----|----|-----|------|------------------------------|------------|-----|-----|-----|----|-----|-------------------|
| Brain region                 | Left/Right | x   | y   | z   | BA | kE  | t    | Brain region                 | Left/Right | x   | y   | z   | BA | kE  | t                 |
| <b>Two sample T-Test</b>     |            |     |     |     |    |     |      |                              |            |     |     |     |    |     |                   |
| <b>M2 &gt; Controls</b>      |            |     |     |     |    |     |      | <b>Controls &gt; M2</b>      |            |     |     |     |    |     |                   |
| <b>Associative learning</b>  |            |     |     |     |    |     |      | <b>Associative learning</b>  |            |     |     |     |    |     |                   |
| Superior frontal gyrus       | L          | -18 | -14 | 60  | 6  | 33  | 4.69 | Hippocampus                  | R          | 36  | -28 | -14 |    | 48  | 5.8               |
| Superior temporal sulcus     | R          | 46  | -28 | 4   |    | 44  | 5.36 | Hippocampus                  | R          | 22  | -28 | -12 |    | 5   | 4.33              |
| Fusiform gyrus               | L          | -20 | -74 | -8  | 19 | 32  | 5.43 | Parahippocampal gyrus        | L          | -14 | -44 | -4  | 30 | 624 | 7.77              |
|                              |            |     |     |     |    |     |      | Superior temporal sulcus     | R          | 44  | 2   | -24 |    | 23  | 5.2               |
| <b>Single face learning</b>  |            |     |     |     |    |     |      | <b>Single face learning</b>  |            |     |     |     |    |     |                   |
| no significant differences   |            |     |     |     |    |     |      | no significant differences   |            |     |     |     |    |     |                   |
| <b>Associative retrieval</b> |            |     |     |     |    |     |      | <b>Associative retrieval</b> |            |     |     |     |    |     |                   |
| no significant differences   |            |     |     |     |    |     |      | Hippocampus                  | R          | 34  | -30 | -12 |    | 95  | 5.17              |
|                              |            |     |     |     |    |     |      | Hippocampus                  | L          | -26 | -34 | -8  |    | 14  | 4.24              |
|                              |            |     |     |     |    |     |      | Middle frontal gyrus         | L          | -40 | 10  | 54  | 6  | 71  | 4.93              |
|                              |            |     |     |     |    |     |      | Superior temporal gyrus      | R          | 48  | 10  | -26 | 38 | 74  | 5.27              |
|                              |            |     |     |     |    |     |      | Retrosplenial cortex         | L          | -6  | -46 | 14  | 29 | 17  | 5.03              |
| <b>Face recognition</b>      |            |     |     |     |    |     |      | <b>Face recognition</b>      |            |     |     |     |    |     |                   |
| no significant differences   |            |     |     |     |    |     |      | Middle frontal gyrus         | R          | 34  | 28  | 26  | 46 | 16  | 4.59              |
|                              |            |     |     |     |    |     |      | Inferior parietal lobule     | R          | 48  | -54 | 44  | 40 | 16  | 4.21              |
| <b>Novel face detection</b>  |            |     |     |     |    |     |      | <b>Novel face detection</b>  |            |     |     |     |    |     |                   |
| no significant differences   |            |     |     |     |    |     |      | Hippocampus                  | R          | 34  | -30 | -12 |    | 14  | 3.64 <sup>a</sup> |
|                              |            |     |     |     |    |     |      | Inferior frontal gyrus       | L          | -56 | 12  | 30  | 9  | 52  | 5.79              |
| <b>Working memory</b>        |            |     |     |     |    |     |      | <b>Working memory</b>        |            |     |     |     |    |     |                   |
| Middle frontal gyrus         | R          | 34  | 54  | -14 | 11 | 50  | 5.55 | no significant differences   |            |     |     |     |    |     |                   |
| Supramarginal gyrus          | R          | 52  | -58 | 40  | 40 | 144 | 5.89 |                              |            |     |     |     |    |     |                   |
| Middle temporal gyrus        | R          | 56  | -64 | 2   | 37 | 19  | 4.4  |                              |            |     |     |     |    |     |                   |
| Insula                       | R          | 40  | 12  | -2  |    | 18  | 4.07 |                              |            |     |     |     |    |     |                   |

t, value of peak within significantly activated cluster of voxels; kE, cluster size (in voxels); BA, Brodmann area; a,  $p < 0.005$ ; L, left; R, right.

Table S7 Contrast estimates (ROI analysis)

|                         | Y1 C410Y | Y2     | Y3     | M1 C410Y | M2     | R1    | R2     | R3   | R4    | R5   | Controls    |              |
|-------------------------|----------|--------|--------|----------|--------|-------|--------|------|-------|------|-------------|--------------|
|                         |          |        |        |          |        |       |        |      |       |      | (M ± SD)    | (P7 / P93)   |
| Associative learning    |          |        |        |          |        |       |        |      |       |      |             |              |
| Left hippocampus        | 0.84     | 0.38   | 0.18   | -0.38    | -0.06  | 0.16  | -0.15  | 0.39 | -0.02 | 0.44 | 0.26 ± 0.71 | -1.03 / 1.58 |
| Left ant. hippocampus   | 0.74     | 0.85   | 0.03   | 0.02     | 0.18   | 0.19  | -0.19  | 0.24 | 0.04  | 0.27 | 0.28 ± 1.13 | -1.52 / 2.54 |
| Left mid. hippocampus   | 1.28**   | 0.17   | 0.42   | -0.98    | -0.05  | 0.07  | 0.04   | 0.5  | -0.33 | 0.63 | 0.28 ± 0.68 | -1.22 / 1.20 |
| Left post. hippocampus  | 0.34     | 0.06   | 0.12   | -0.46*   | -0.51* | 0.25  | -0.32* | 0.56 | 0.68  | 0.43 | 0.44 ± 0.35 | -0.29 / 0.96 |
| Right hippocampus       | 0.50     | 0.42   | 0.16   | 0.03     | 0.62   | 0.18  | 0.16   | 0.38 | 0.18  | 0.4  | 0.32 ± 0.56 | -0.42 / 1.49 |
| Right ant. hippocampus  | 0.48     | 0.29   | -0.03  | 0.25     | 1.31   | 0.34  | 0.24   | 0.11 | 0.02  | 0.32 | 0.37 ± 0.95 | -0.48 / 2.42 |
| Right mid. hippocampus  | 0.52     | 0.45   | 0.29   | -0.12    | 0.09   | 0.08  | -0.03  | 0.49 | 0.37  | 0.60 | 0.35 ± 0.63 | -0.79 / 1.54 |
| Right post. hippocampus | 0.52     | 0.59   | 0.26   | -0.23    | 0.24   | 0.20  | 0.30   | 0.58 | 0.02  | 0.32 | 0.32 ± 0.3  | -0.03 / 0.9  |
| Single face learning    |          |        |        |          |        |       |        |      |       |      |             |              |
| Left hippocampus        | 0.54     | 0.74   | -0.02  | -0.17    | 0.17   | 0.22  | 0.16   | 0.38 | 0.25  | 0.53 | 0.4 ± 0.66  | -0.48 / 1.81 |
| Left ant. hippocampus   | 0.63     | 1.63   | -0.20  | 0.25     | 0.68   | 0.49  | -0.08  | 0.36 | -0.12 | 0.40 | 0.41 ± 0.91 | -0.63 / 2.35 |
| Left mid. hippocampus   | 0.71     | 0.34   | 0.23   | -0.82*   | -0.09  | 0.15  | 0.29   | 0.48 | 0.38  | 0.71 | 0.53 ± 0.62 | -0.57 / 1.78 |
| Left post. hippocampus  | 0.05     | 0.11   | -0.06* | -0.21*   | -0.34* | 0.04  | 0.41   | 0.22 | 0.56  | 0.44 | 0.35 ± 0.35 | 0 / 1.13     |
| Right hippocampus       | 0.35     | 0.33   | -0.40  | 0.23     | -0.03  | 0.19  | 0.27   | 0.4  | 0.45  | 0.64 | 0.44 ± 0.61 | -0.11 / 1.87 |
| Right ant. hippocampus  | 0.44     | 0.30   | -0.15  | 0.69     | -0.04  | 0.26  | 0.33   | 0.32 | 0.11  | 0.56 | 0.41 ± 0.63 | -0.22 / 1.83 |
| Right mid. hippocampus  | 0.27     | 0.28   | 0.07   | -0.13    | 0.05   | 0.27  | 0.24   | 0.47 | 0.62  | 0.78 | 0.6 ± 0.71  | -0.22 / 2.33 |
| Right post. hippocampus | 0.25     | 0.49   | -0.03  | -0.18*   | -0.14  | -0.03 | 0.18   | 0.41 | 0.56  | 0.62 | 0.37 ± 0.55 | -0.15 / 1.56 |
| Associative retrieval   |          |        |        |          |        |       |        |      |       |      |             |              |
| Left hippocampus        | 0.23     | -0.43  | -1.11* | -0.52    | 0.09   | -0.23 | 0.24   | 0.7  | 0.01  | 0.23 | 0.11 ± 0.55 | -0.97 / 1.05 |
| Left ant. hippocampus   | 0.17     | -0.24  | -1.86* | -0.04    | 0.62   | -0.04 | 0.14   | 0.59 | -0.02 | 0.20 | 0.02 ± 0.58 | -1.18 / 0.88 |
| Left mid. hippocampus   | 0.30     | -0.35  | -0.53  | -1.17*   | -0.04  | -0.62 | 0.62   | 0.78 | -0.22 | 0.27 | 0.15 ± 0.7  | -1.13 / 1.33 |
| Left post. hippocampus  | 0.27     | -0.75* | -0.59* | -0.67*   | -0.65* | 0.06  | -0.05  | 0.83 | 0.76  | 0.2  | 0.44 ± 0.45 | -0.29 / 1.3  |
| Right hippocampus       | 0.24     | 0.02   | -0.17  | -0.11    | 0.80   | -0.11 | 0.32   | 0.52 | 0.20  | 0.15 | 0.17 ± 0.44 | -0.46 / 1.02 |
| Right ant. hippocampus  | 0.37     | 0.58   | -0.42  | 0.11     | 0.42   | 0.14  | 0.30   | 0.52 | 0.19  | 0.14 | 0.18 ± 0.57 | -0.61 / 1.43 |
| Right mid. hippocampus  | 0.15     | -0.67  | 0.10   | -0.16    | -0.11  | -0.41 | 0.34   | 0.47 | 0.20  | 0.11 | 0.17 ± 0.59 | -0.85 / 1.19 |
| Right post. hippocampus | 0.05     | 0.20   | -0.17  | -0.48*   | -0.22  | 0.19  | 0.33   | 0.63 | 0.22  | 0.24 | 0.19 ± 0.35 | -0.33 / 0.82 |
| Face recognition        |          |        |        |          |        |       |        |      |       |      |             |              |
| Left hippocampus        | 0.56     | 0.76   | -0.74  | -0.77    | 0.11   | -0.13 | 0.19   | 0.74 | -0.10 | 0.34 | 0.34 ± 0.59 | -0.8 / 1.45  |
| Left ant. hippocampus   | 0.58     | 1.50** | -0.78* | -0.45    | 0.57   | 0.35  | 0.11   | 0.64 | 0.05  | 0.43 | 0.3 ± 0.56  | -0.57 / 1.38 |
| Left mid. hippocampus   | 0.65     | 0.69   | -0.87* | -1.21*   | 0.09   | -0.55 | 0.73   | 0.91 | -0.45 | 0.38 | 0.43 ± 0.75 | -0.85 / 1.7  |
| Left post. hippocampus  | 0.34     | -0.04  | -0.49* | -0.88*   | -0.67* | -0.08 | -0.38* | 0.68 | 0.57  | 0.07 | 0.56 ± 0.54 | -0.24 / 1.44 |
| Right hippocampus       | 0.39     | 0.80   | -0.34  | -0.27    | 0.04   | -0.05 | 0.32   | 0.62 | -0.04 | 0.31 | 0.31 ± 0.44 | -0.48 / 1.14 |
| Right ant. hippocampus  | 0.52     | 1.15   | -0.69* | -0.34*   | 0.40   | 0.14  | 0.38   | 0.68 | -0.13 | 0.28 | 0.36 ± 0.47 | -0.15 / 1.26 |
| Right mid. hippocampus  | 0.36     | 0.54   | -0.19  | -0.06    | -0.22  | -0.37 | 0.24   | 0.51 | -0.20 | 0.30 | 0.32 ± 0.61 | -0.71 / 1.64 |
| Right post. hippocampus | 0.12     | 0.62   | -0.08  | -0.50*   | -0.18  | 0.34  | 0.31   | 0.74 | 0.35  | 0.40 | 0.34 ± 0.42 | -0.26 / 1.04 |
| Novel face detection    |          |        |        |          |        |       |        |      |       |      |             |              |
| Left hippocampus        | 0.49     | 0.26   | -0.31  | -0.91*   | 0.22   | -0.18 | 0.37   | 0.63 | -0.23 | 0.23 | 0.31 ± 0.64 | -0.83 / 1.38 |
| Left ant. hippocampus   | 0.52     | 0.77   | -0.50  | -0.35    | 0.77   | 0.20  | 0.21   | 0.56 | 0.25  | 0.20 | 0.31 ± 0.6  | -0.85 / 1.23 |
| Left mid. hippocampus   | 0.62     | 0.06   | -0.35  | -1.65*   | 0.08   | -0.55 | 0.83   | 0.77 | -0.57 | 0.37 | 0.40 ± 0.80 | -1 / 1.56    |
| Left post. hippocampus  | 0.23     | -0.11  | 0.08   | -1.15*   | -0.57* | -0.1  | 0.06   | 0.55 | -0.16 | 0.03 | 0.43 ± 0.57 | -0.28 / 1.5  |
| Right hippocampus       | 0.58     | 0.51   | 0.07   | -0.24    | 0.33   | -0.07 | 0.57   | 0.51 | -0.06 | 0.29 | 0.28 ± 0.44 | -0.48 / 0.94 |
| Right ant. hippocampus  | 0.66     | 0.96   | -0.47  | -0.21    | 0.86   | -0.02 | 0.64   | 0.45 | 0.05  | 0.29 | 0.33 ± 0.53 | -0.51 / 1.39 |
| Right mid. hippocampus  | 0.59     | 0.04   | 0.38   | -0.24    | 0.01   | -0.15 | 0.53   | 0.48 | -0.25 | 0.34 | 0.28 ± 0.57 | -0.83 / 1.22 |
| Right post. hippocampus | 0.39     | 0.52   | 0.38   | -0.30    | -0.08  | 0.04  | 0.48   | 0.66 | 0.13  | 0.25 | 0.32 ± 0.46 | -0.53 / 1.02 |

\*, contrast estimates (CE) values that are below the control group's P7; \*\*, CE values that are above the control group's P93; ant., anterior; mid., middle; post., posterior.
